# Supplementary material for: Interferon gamma release assay tests are associated with persistence and completion of latent tuberculosis infection treatment in the United States: Evidence from commercial insurance data
Source: PubMed Central journal article supplement (PMC7714216; doi:10.1371/journal.pone.0243102), 2020-12-03
Supplement: pone.0243102.s001.pdf [file pone.0243102.s001.pdf]

**S1 Table:** Prescription fill patterns in persons receiving  $\geq 6$  months of isoniazid in a 12 month period who were not categorized as having completed the 6 month regimen.

| <b>Categorization in Table 1</b>                                          | <b>Count</b> | <b>Doses in 12 months</b> | <b>Doses in 9 Months</b> | <b>Percent of Total</b> | <b>Months of INH in Year</b> |
|---------------------------------------------------------------------------|--------------|---------------------------|--------------------------|-------------------------|------------------------------|
| 6 months of isoniazid received but 6-month treatment regimen not complete | 2            | 180                       | 90                       | 0.3%                    | 6                            |
|                                                                           | 1            | 180                       | 120                      | 0.2%                    | 6                            |
|                                                                           | 6            | 180                       | 150                      | 0.9%                    | 6                            |
| 7 months of isoniazid received but 6-month treatment regimen not complete | 2            | 210                       | 150                      | 0.3%                    | 7                            |
